# Supplementary material for: Nasal administration of recombinant Neospora caninum secreting IL-15/IL-15Rα inhibits metastatic melanoma development in lung
Source: HighWire-hosted journal article supplement (doi:10.1136/jitc-2023-006683), 2023-05-01
Supplement: jitc-2023-006683supp001_data_supplement.pdf [file jitc-2023-006683supp001_data_supplement.pdf]

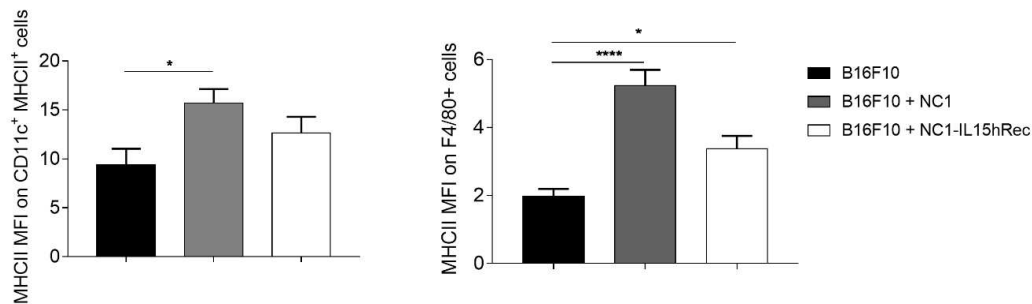

**Supp figure 1: MHC-II increased expression on DCs and macrophages after *N. caninum* treatment.**

B16F10 cells ( $1 \times 10^5$  in 100  $\mu$ L of PBS) were inoculated intravenously in C57Bl/6 mice and  $2 \times 10^6$  NC1 or NC1-IL15hRec tachyzoites were administered intranasally 7 days later (A). Forty days after tumor cell inoculation, mice were euthanized to study the immune response induced by *N. caninum*. Lungs were collected and dissociated, tumor cell suspensions were centrifuged and cells were resuspended for staining and flow cytometry analysis and MHC-II expression level was assessed. N=10 mice per group. \* p < 0.05; \*\*\*\* p < 0.0001.
