# Supplementary material for: Nasal administration of recombinant Neospora caninum secreting IL-15/IL-15Rα inhibits metastatic melanoma development in lung
Source: HighWire-hosted journal article supplement (doi:10.1136/jitc-2023-006683), 2023-05-01
Supplement: jitc-2023-006683supp003_data_supplement.pdf [file jitc-2023-006683supp003_data_supplement.pdf]

| Mice               | Tumor size | Macrophages | MFI CD86 macrophages | MFI CD206 macrophages | Alveolar macrophages | MFI CD86 alveolar macrophages | MFI CD206 alveolar macrophages | NK cells | CD8+ T cells | CD4+ T cells | B cells | Treg | B16F10 lung | Circulating B16F10 cells | CD11c+ CD11b+ cells | DC   | PMN      | CD11b+ cells | ly6G+ cells |
|--------------------|------------|-------------|----------------------|-----------------------|----------------------|-------------------------------|--------------------------------|----------|--------------|--------------|---------|------|-------------|--------------------------|---------------------|------|----------|--------------|-------------|
| B16F10_1           | 0.29396453 | 9.41        | 1.61                 | 5.07                  | 11.35                | 2.81                          | 14.66                          | 2.37     | 3.064884     | 2.731824     | 27.82   | 0.31 | 20.72       | 0.0012                   | 4.99                | 0.46 | 1.237104 | 12.78        | 1.55326     |
| B16F10_2           | 1.15385211 | 16.36       | 1.3                  | 4.67                  | 14.48                | 2.37                          | 14.85                          | 2.53     | 4.571264     | 4.32248      | 35      | 0.19 | 40.16       | 0.0019                   | 5.26                | 0.62 | 1.261008 | 12.51        | 1.756404    |
| B16F10_3           | 0.19902054 | 14.83       | 1.36                 | 3.85                  | 16.43                | 2.57                          | 10.66                          | 3        | 5.494751     | 5.92865      | 37.16   | 0.04 | 51.78       | 0.0034                   | 5.49                | 0.72 | 2.050366 | 13.66        | 1.896008    |
| B16F10_4           | 0.30748046 | 17.99       | 1.44                 | 4.43                  | 16.3                 | 2.59                          | 17.27                          | 3.25     | 4.270779     | 4.608786     | 36.44   | 0.09 | 61.92       | 0.0005                   | 3.96                | 0.59 | 1.065597 | 11.57        | 1.977313    |
| B16F10_5           | 0.28722771 | 15.76       | 1.48                 | 5.99                  | 17.98                | 2.46                          | 10.97                          | 2.46     | 6.426816     | 8.238336     | 35.36   | 0.13 | 65.48       | 0.0004                   | 5.56                | 1.02 | 1.524393 | 13.13        | 1.330069    |
| NC1 liv_1          | 0.04653683 | 12.92       | 1.48                 | 5.77                  | 16.69                | 2.49                          | 8.17                           | 3        | 4.15596      | 5.04686      | 33.97   | 0.12 | 59.74       | 0                        | 3.05                | 0.47 | 0.595852 | 7.24         | 1.086724    |
| NC1 liv_2          | 0.18253089 | 14.55       | 1.52                 | 4.69                  | 18.68                | 2.47                          | 12.24                          | 3.05     | 3.1185       | 4.417644     | 37.94   | 0.18 | 56.66       | 0.0003                   | 4.31                | 0.91 | 0.488022 | 9.78         | 1.01223     |
| NC1 liv_3          | 0.06218887 | 14.89       | 1.52                 | 5.76                  | 19                   | 2.58                          | 13.39                          | 4.47     | 4.11723      | 4.778595     | 37.34   | 0.04 | 65.86       | 0.0001                   | 3.88                | 0.57 | 0.719558 | 9.98         | 0.907182    |
| NC1 liv_4          | 0.01889106 | 19.07       | 1.66                 | 4.64                  | 17.28                | 3.63                          | 16.39                          | 4.27     | 2.111252     | 2.170168     | 31.31   | 0    | 34.49       | 0.0002                   | 11.19               | 0.4  | 1.534896 | 25.08        | 9.252012    |
| NC1 liv_5          | 0.40732239 | 16.45       | 2.03                 | 3.66                  | 23.01                | 2.77                          | 9.95                           | 3.4      | 3.912111     | 7.672077     | 32.22   | 0.05 | 43.41       | 0.0003                   | 5.08                | 0.57 | 1.307912 | 13.04        | 2.159424    |
| NC1 lin_1          | 0.01110562 | 35.37       | 2.09                 | 3.46                  | 22.05                | 4.18                          | 2.51                           | 4.64     | 3.159484     | 4.584988     | 37.52   | 0.13 | 44.28       | 0.0002                   | 4.22                | 0.84 | 0.912625 | 10.43        | 0.831271    |
| NC1 lin_2          | 0.11897853 | 46.39       | 2.58                 | 2.26                  | 23.02                | 4.51                          | 4.14                           | 3.84     | 2.063556     | 1.875852     | 26.47   | 0.15 | 33.59       | 0                        | 9.18                | 0.43 | 1.043048 | 21.64        | 7.775252    |
| NC1 lin_3          | 0.26158286 | 32.9        | 2.02                 | 2.15                  | 22.41                | 3.81                          | 3.92                           | 4.02     | 1.94208      | 1.97744      | 35      | 0.15 | 45.26       | 0                        | 11.08               | 0.5  | 1.419    | 25.8         | 9.50472     |
| NC1 lin_4          | 0.11183955 | 42.8        | 2.43                 | 2.61                  | 29.08                | 4.26                          | 4.5                            | 5.54     | 2.144934     | 2.535543     | 29.91   | 0.06 | 51.95       | 0.0001                   | 14.75               | 0.87 | 1.055736 | 28.38        | 8.45724     |
| NC1 lin_5          | 0.20111669 | 29.93       | 1.8                  | 4.63                  | 21.17                | 5.61                          | 7.57                           | 2.27     | 0.753992     | 0.651454     | 51.24   | 0.33 | 57.85       | 0.0004                   | 9.28                | 0.51 | 1.409672 | 21.23        | 6.143962    |
| NC1-IL15HRec liv_1 | 0.217496   | 14.75       | 1.42                 | 4.17                  | 13.51                | 2.72                          | 12.81                          | 3.52     | 3.99056      | 4.57758      | 46.04   | 0.07 | 53.83       | 0.0001                   | 5.2                 | 0.52 | 0.99063  | 12.23        | 1.735437    |
| NC1-IL15HRec liv_2 | 0.22232103 | 16.31       | 1.68                 | 3.83                  | 17.7                 | 2.93                          | 10.15                          | 3.24     | 4.117366     | 5.727205     | 30.28   | 0.09 | 60.2        | 0                        | 4.56                | 0.67 | 1.30979  | 11.54        | 1.340948    |
| NC1-IL15HRec liv_3 | 0.03839858 | 13.52       | 1.46                 | 4.19                  | 16.09                | 2.66                          | 11.68                          | 2.8      | 3.627514     | 6.212206     | 45.94   | 0.15 | 63.34       | 0.0001                   | 4.13                | 0.49 | 1.04139  | 10.26        | 1.134756    |
| NC1-IL15HRec liv_4 | 0.2829087  | 16.32       | 1.48                 | 7.25                  | 19.32                | 2.54                          | 18.99                          | 2.39     | 2.734281     | 3.388759     | 37.69   | 0.08 | 70.82       | 0.0001                   | 3.83                | 0.65 | 0.711018 | 8.91         | 0.858033    |
| NC1-IL15HRec liv_5 | 0.10006083 | 14.97       | 1.63                 | 5.82                  | 17.29                | 2.74                          | 13.07                          | 3.48     | 5.63712      | 7.25926      | 30.4    | 0.06 | 62.61       | 0                        | 3.81                | 0.85 | 1.375956 | 10.33        | 0.788179    |
| NC1-IL15HRec lin_1 | 0.01721251 | 32.27       | 2.62                 | 2.84                  | 27.58                | 4.44                          | 4.58                           | 3.01     | 1.527994     | 1.604018     | 34.12   | 0.04 | 57.98       | 0                        | 10.49               | 0.52 | 1.13049  | 21.33        | 5.296239    |
| NC1-IL15HRec lin_2 | 0.03752298 | 37.62       | 2.67                 | 5.17                  | 21.75                | 5.48                          | 11.26                          | 3.81     | 2.223531     | 3.958887     | 33.34   | 0.13 | 7.91        | 0                        | 5.06                | 0.6  | 1.880359 | 14.17        | 1.263964    |
| NC1-IL15HRec lin_3 | 0          | 33.37       | 2.63                 | 3.95                  | 25.26                | 4.57                          | 2.97                           | 1.98     | 1.02334      | 1.43982      | 28      | 0.05 | 49.32       | 0                        | 13.35               | 0.5  | 1.99622  | 33.05        | 10.55617    |
| NC1-IL15HRec lin_4 | 0          | 46.19       | 3.21                 | 2.42                  | 28.66                | 5.32                          | 4.03                           | 4.64     | 1.772478     | 2.001339     | 26.04   | 0.07 | 49.01       | 0.0001                   | 14.33               | 0.67 | 1.11115  | 31.3         | 9.16464     |
| NC1-IL15HRec lin_5 | 0.00694146 | 33.9        | 2.56                 | 2.92                  | 25.7                 | 4.26                          | 4.85                           | 3.25     | 1.408626     | 1.577511     | 29.22   | 0    | 30.85       | 0.0003                   | 10.94               | 0.47 | 1.328676 | 25.26        | 8.944566    |

### Supp table 1: Flow cytometry and ImageJ data,

from mice euthanized at 9 days post tumor cells inoculation or 2 days post-treatment. These data were used to perform a principal component analysis and generate the heatmap in Fig 3 A.
