# Supplementary material for: Nasal administration of recombinant Neospora caninum secreting IL-15/IL-15Rα inhibits metastatic melanoma development in lung
Source: HighWire-hosted journal article supplement (doi:10.1136/jitc-2023-006683), 2023-05-01
Supplement: jitc-2023-006683supp004_data_supplement.pdf [file jitc-2023-006683supp004_data_supplement.pdf]

| Mice                | Tumor size | Macrophages | MFI CD86 macrophages | MFI CD206 macrophages | Alveolar macrophages | MFI CD86 alveolar macrophages | MFI CD206 alveolar macrophages | NK cells | CD8+ T cells | CD4+ T cells | B cells | Treg | B16F10 lung | Circulating B16F10 cells | CD11c+ CD11b+ cells | DC   | PMN      | CD11b+ cells | Ly6C+ cells |
|---------------------|------------|-------------|----------------------|-----------------------|----------------------|-------------------------------|--------------------------------|----------|--------------|--------------|---------|------|-------------|--------------------------|---------------------|------|----------|--------------|-------------|
| B16F10_1            | 48.294361  | 15.88       | 1.04                 | 12.94                 | 1.62                 | 2.26                          | 14.09                          | 0.26     | 0.579801     | 0.559391     | 10.99   | 0.45 | 59.7        | 0.0086                   | 3.42                | 0.23 | 4.379295 | 16.13        | 1.714619    |
| B16F10_2            | 25.0042098 | 15.81       | 1.65                 | 8.34                  | 2.64                 | 4.41                          | 22.69                          | 0.58     | 5.72523      | 4.86555      | 30.96   | 0.09 | 66.45       | 0.0014                   | 3.23                | 0.09 | 1.775844 | 15.66        | 2.720142    |
| B16F10_3            | 16.8712989 | 14.28       | 2.2                  | 10.18                 | 4.9                  | 5.22                          | 16.99                          | 0.78     | 2.34133      | 2.64273      | 26.36   | 0.1  | 43.53       | 0.0011                   | 3.32                | 0.3  | 0.889224 | 14.07        | 2.56074     |
| B16F10_4            | 7.84464957 | 17.69       | 3.9                  | 14.2                  | 8.57                 | 3.59                          | 27.61                          | 0.8      | 2.80962      | 2.77332      | 25.72   | 0.28 | 81.53       | 0.0024                   | 2.44                | 0.28 | 1.06516  | 8.59         | 1.100379    |
| B16F10_5            | 9.02762308 | 15.3        | 2.83                 | 10.57                 | 6.47                 | 3.73                          | 15.95                          | 0.88     | 2.135538     | 2.908728     | 25.38   | 0.09 | 45.49       | 0.0015                   | 5.67                | 0.17 | 1.052714 | 21.31        | 4.700986    |
| NC1 i.v._1          | 2.43538604 | 20.59       | 3.28                 | 6.1                   | 9.09                 | 9.85                          | 10.76                          | 4.42     | 7.967006     | 3.113354     | 21.33   | 0    | 21.06       | 0.0018                   | 5.86                | 0.1  | 1.292    | 9.5          | 1.96175     |
| NC1 i.v._2          | 11.8538604 | 19.55       | 1.65                 | 5.91                  | 4.33                 | 5.56                          | 10.83                          | 0.37     | 7.038243     | 2.509325     | 18.56   | 0.22 | 13.52       | 0.0003                   | 3.4                 | 0.05 | 1.457356 | 9.16         | 1.193548    |
| NC1 i.v._3          | 2.8968994  | 34.89       | 2.84                 | 6.27                  | 10.55                | 8.35                          | 9.14                           | 0.76     | 11.31146     | 4.177886     | 27.94   | 0.15 | 70.98       | 0.0006                   | 1.88                | 0.1  | 2.2418   | 5.5          | 0.865515    |
| NC1 i.v._4          | 4.32663398 | 20.79       | 2.28                 | 6.41                  | 8.41                 | 6.21                          | 12.4                           | 1.22     | 10.0425      | 3.204        | 30.52   | 0.08 | 50.01       | 0.001                    | 6.08                | 0.18 | 1.97478  | 10.35        | 2.120715    |
| NC1 i.v._5          | 3.4266329  | 15.21       | 3.89                 | 6.31                  | 13.44                | 9.82                          | 8.67                           | 0.96     | 13.120206    | 6.770718     | 18.27   | 0.11 | 27.21       | 0.0004                   | 4.21                | 0.53 | 1.715511 | 10.57        | 1.697542    |
| NC1 i.n._1          | 0.44575956 | 17.12       | 4.1                  | 5.73                  | 11.41                | 9.31                          | 10.19                          | 1.81     | 10.55436     | 3.21764      | 22.42   | 0.14 | 38.08       | 0.0004                   | 1.98                | 0.07 | 0.802184 | 3.94         | 0.590606    |
| NC1 i.n._2          | 1.2613066  | 58.33       | 5.7                  | 6.99                  | 12.03                | 10.74                         | 9.68                           | 2.49     | 12.5033      | 4.70256      | 28.06   | 0    | 4.31        | 0.0004                   | 4.19                | 0.77 | 0.7718   | 11.35        | 1.23261     |
| NC1 i.n._3          | 7.88915794 | 23          | 1.48                 | 3.88                  | 7.14                 | 4.75                          | 8.19                           | 1.09     | 10.620445    | 4.100525     | 25.33   | 0.18 | 55.1        | 0.0005                   | 6.06                | 0.23 | 0.52054  | 15.31        | 2.063788    |
| NC1 i.n._4          | 2.54987875 | 25.14       | 2.9                  | 4.46                  | 8.72                 | 8.27                          | 9.48                           | 1.39     | 7.65006      | 4.268704     | 32.25   | 0.03 | 48.66       | 0.0006                   | 2.13                | 0.08 | 2.69667  | 5.7          | 0.5586      |
| NC1 i.n._5          | 1.21075448 | 33.27       | 4.52                 | 7.91                  | 11.22                | 9.17                          | 10.35                          | 2.72     | 9.869568     | 5.04384      | 16.94   | 0.08 | 24.97       | 0.0005                   | 2.91                | 0.11 | 1.803774 | 6.41         | 0.905733    |
| NC1-IL15hRec.i.v._1 | 0          | 19.1        | 3.62                 | 6.4                   | 17.91                | 6.21                          | 10.12                          | 2.09     | 9.656646     | 5.439558     | 14.8    | 0.16 | 28.79       | 0.0002                   | 3.13                | 0.25 | 1.51496  | 4.64         | 0.731264    |
| NC1-IL15hRec.i.v._2 | 0.09816918 | 34.64       | 4.91                 | 6.66                  | 19.3                 | 9.36                          | 7.28                           | 0.85     | 13.012032    | 6.110016     | 21.25   | 0.08 | 26.56       | 0.0001                   | 1.76                | 0.13 | 2.539658 | 4.82         | 0.513333    |
| NC1-IL15hRec.i.v._3 | 0          | 20.16       | 5.39                 | 6.47                  | 18.71                | 9.72                          | 6.52                           | 0.76     | 17.334       | 6.963025     | 18.62   | 0.08 | 28.27       | 0.0002                   | 1.94                | 0.2  | 2.087126 | 5.21         | 0.649687    |
| NC1-IL15hRec.i.v._4 | 0.25253092 | 24.17       | 4.57                 | 6.06                  | 18.27                | 8.72                          | 11.03                          | 0.96     | 11.020794    | 6.927596     | 10.31   | 0.12 | 30.3        | 0.0001                   | 1.43                | 0.12 | 0.997542 | 2.61         | 0.346608    |
| NC1-IL15hRec.i.v._5 | 0.29020901 | 18.37       | 3.34                 | 5.85                  | 13.22                | 8.25                          | 8.88                           | 1.83     | 10.185505    | 4.690939     | 18.61   | 0.14 | 32.67       | 0.0002                   | 2.82                | 0.12 | 1.63709  | 4.55         | 0.70889     |
| NC1-IL15hRec.i.n._1 | 0.20639971 | 51.45       | 4.38                 | 4.03                  | 13.02                | 8.5                           | 10.3                           | 1.13     | 11.60843     | 6.2110815    | 16.24   | 0.1  | 15.22       | 0.0003                   | 1.42                | 0.09 | 0.930656 | 2.54         | 0.227584    |
| NC1-IL15hRec.i.n._2 | 0.2493405  | 50.07       | 4.8                  | 4.17                  | 16.8                 | 9.13                          | 8.56                           | 1.63     | 18.894266    | 5.311168     | 18.1    | 0.21 | 23.89       | 0.0001                   | 1.8                 | 0.12 | 2.43204  | 5.2          | 0.6526      |
| NC1-IL15hRec.i.n._3 | 0.21989065 | 40.36       | 6.25                 | 5.33                  | 12.5                 | 6.45                          | 6.19                           | 2.1      | 12.617176    | 5.954584     | 19.44   | 0.18 | 31.06       | 0.0003                   | 1.22                | 0.06 | 1.532196 | 3.24         | 0.346356    |
| NC1-IL15hRec.i.n._4 | 0.05311586 | 14.97       | 4.99                 | 4.6                   | 13.5                 | 8.88                          | 8.35                           | 1.49     | 17.40466     | 6.0391       | 14.94   | 0.02 | 25.1        | 0.0005                   | 1.79                | 0.16 | 1.692999 | 4.41         | 0.421596    |
| NC1-IL15hRec.i.n._5 | 0.34423653 | 18.81       | 4.59                 | 3.95                  | 10.53                | 8.38                          | 9.42                           | 2.37     | 17.051426    | 6.851068     | 15.7    | 0.21 | 23.31       | 0.0013                   | 2.55                | 0.09 | 0.878306 | 4.07         | 0.680097    |

**Supp table 2: Flow cytometry and ImageJ data,**  
 from mice euthanized at 21 days post tumor cells inoculation or 14 days post-treatment. These data were used to perform a principal component analysis and generate the heatmap in Fig 3 B.
