# Supplementary material for: Nasal administration of recombinant Neospora caninum secreting IL-15/IL-15Rα inhibits metastatic melanoma development in lung
Source: HighWire-hosted journal article supplement (doi:10.1136/jitc-2023-006683), 2023-05-01
Supplement: jitc-2023-006683supp005_data_supplement.pdf [file jitc-2023-006683supp005_data_supplement.pdf]

|                 | D13  |      |       |      | D20 |      |       |      |
|-----------------|------|------|-------|------|-----|------|-------|------|
|                 | NF   | BALF | Brain | Lung | NF  | BALF | Brain | Lung |
| NC1             | 100% | 100% | 100%  | 100% | 0%  | 0%   | 66%   | 33%  |
| B16F10 +<br>NC1 | 100% | 100% | 100%  | 100% | 0%  | 0%   | 33%   | 33%  |

Supp table 3: Dissemination of *N. caninum* after treatment with or without prior administration of B16F10 cells. B16F10 cells ( $5 \times 10^5$  in 100  $\mu$ L of PBS) were inoculated intravenously in six C57Bl/6 mice. At day 7,  $2 \times 10^6$  *N. caninum* tachyzoites were administered intranasally to B16F10-implanted mice and six unimplanted mice. Three mice per group were euthanized at day 13 and day 20. At each time point, nasal fluid (NF), bronchoalveolar fluid (BALF), brain and lung were collected to assess *N. caninum* dissemination by nested PCR (n=3 per group).
